# Supplementary material for: Survival outcomes of patients with germ cell tumors treated with high-dose chemotherapy for refractory or relapsing disease
Source: PubMed Central journal article supplement (PMC5976483; doi:10.18632/oncotarget.25162), 2018-04-27
Supplement: oncotarget-09-22537-s001.pdf [file oncotarget-09-22537-s001.pdf]

## Survival outcomes of patients with germ cell tumors treated with high-dose chemotherapy for refractory or relapsing disease

### SUPPLEMENTARY MATERIALS

**Supplementary Table 1: Patient characteristics of subgroup with complete remission or additive local treatment post HDCT/ ASCT (*n* = 28)**

| Characteristic                    | No.   | %  |
|-----------------------------------|-------|----|
| Median age, years                 | 36    |    |
| Range, years                      | 15–59 |    |
| Primary tumor site                |       |    |
| Gonadal                           | 22    | 79 |
| Mediastinal                       | 6     | 21 |
| Extragonadal                      | 0     | 0  |
| IPFSG risk group at first relapse |       |    |
| Very low                          | 2     | 7  |
| Low                               | 6     | 21 |
| Intermediate                      | 9     | 32 |
| High                              | 6     | 21 |
| Very high                         | 5     | 18 |
| LBB metastases at HDCT/ASCT       |       |    |
| Yes                               | 14    | 50 |
| No                                | 14    | 50 |
| Platinum responsive disease       |       |    |
| Yes                               | 19    | 68 |
| No                                | 9     | 32 |
| Salvage line of HSCT/ASCT         |       |    |
| First                             | 22    | 79 |
| Second                            | 6     | 21 |
| ≥ Third                           | 0     | 0  |

Abbreviations: ASCT: autologous stem cell transplantation; HDCT: high dose chemotherapy; IGCCCG: International Germ Cell Cancer Collaborative Group; IPFSG: International Prognostic Factors Study Group.

**Supplementary Table 2: Mobilization chemotherapy and high dose chemotherapy regimen**

| Mobilization chemotherapy | High dose chemotherapy (HDCT)  | Number of HDCT cycles conducted/ anticipated | Reason for treatment discontinuation | Number of patients | Annotation                               |
|---------------------------|--------------------------------|----------------------------------------------|--------------------------------------|--------------------|------------------------------------------|
| CEI                       | CE                             | 3/3                                          |                                      | 2                  |                                          |
| CEI                       | other (CE-CE-ET)               | 3/3                                          |                                      | 1                  | Change of HDCT type due to complications |
| PEI                       | CE                             | 3/3                                          |                                      | 13                 |                                          |
|                           |                                | 2/3                                          | PD                                   | 1                  |                                          |
|                           |                                | 2/3                                          | complications                        | 2                  |                                          |
|                           |                                | 1/3                                          | complications                        | 2                  |                                          |
|                           |                                | 2/2                                          |                                      | 2                  |                                          |
|                           |                                | 1/1                                          |                                      | 2                  |                                          |
| PEI                       | CEC                            | 2/2                                          |                                      | 1                  |                                          |
|                           |                                | 1/1                                          |                                      | 2                  |                                          |
| PEI                       | CET                            | 1/1                                          |                                      | 1                  |                                          |
| PEI                       | PEI                            | 3/3                                          |                                      | 2                  |                                          |
|                           |                                | 2/2                                          |                                      | 1                  |                                          |
| PEI                       | PEI-Paclitaxel                 | 3/3                                          |                                      | 1                  |                                          |
|                           |                                | 2/3                                          | PD                                   | 1                  |                                          |
| PEI                       | other                          | 3/3                                          |                                      | 1                  | PEI-Paclitaxel --> PD --> 3 cycles CE    |
| TI                        | CE                             | 3/3                                          |                                      | 1                  |                                          |
| TI                        | PEI-Paclitaxel                 | 3/3                                          |                                      | 1                  |                                          |
| TI                        | other (PEI-Paclitaxel-PEI-CEI) | 3/3                                          |                                      | 1                  | Change of HDCT type due to complications |
| TIP                       | CE                             | 3/3                                          |                                      | 2                  |                                          |
|                           |                                | 2/3                                          | complications                        | 1                  |                                          |
|                           |                                | 1/1                                          |                                      | 1                  |                                          |
| TIP                       | CET                            | 1/1                                          |                                      | 1                  |                                          |
| TIP                       | other (PEI-CIT)                | 2/3                                          | PD                                   | 1                  | Change of HDCT type due to PD            |
| None (plerixafor + GCSF)  | CET                            | 1/1                                          |                                      | 1                  |                                          |
| None (GCSF only)          | CE                             | 1/3                                          | complications                        | 1                  |                                          |

Abbreviations: CE: carboplatin etoposide; CEC: carboplatin etoposide cyclophosphamide; CEI: carboplatin etoposid ifosfamide; CET: carboplatin etoposide thiotepa; CIT: carboplatin ifosfamide paclitaxel; ET: etoposide thiotepa; HDCT: high dose chemotherapy; PEI: cisplatin etoposide ifosfamide; PD: progressive disease; TI: paclitaxel ifosfamide; TIP: paclitaxel ifosfamide cisplatin.
